# Supplementary material for: Ultra-highly selective trapping of perrhenate/pertechnetate by a flexible cationic coordination framework
Source: Royal Society of Chemistry journal article supplement (doi:10.1039/c8cc09364d), 2019-01-01
Supplement: c8cc09364d1.pdf [file c8cc09364d1.pdf]

*Electronic Supplementary Information*

**Ultra-highly selective trapping of perrhenate/pertechnetate by a  
flexible cationic coordination framework**

Cheng-Peng Li, Jin-Yun Ai, Hang Zhou, Qi Chen, Yijie Yang, Hongming He, and Miao Du\*

*College of Chemistry, Tianjin Key Laboratory of Structure and Performance for Functional Molecules,  
MOE Key Laboratory of Inorganic–Organic Hybrid Functional Material Chemistry, Tianjin Normal Uni-  
versity, Tianjin 300387, China*

\* *Corresponding author. E-mail: [hxydm@tjnu.edu.cn](mailto:hxydm@tjnu.edu.cn)*

***Chem. Commun.***

## Experimental details

**Materials and general methods.** Deionized water was employed throughout the experiments. The tib ligand was purchased from Tianjin Dadikanghe Medical Technology Co. Ltd. Elemental analysis for C, H, and N was performed on a Vario EL III Elementar analyzer. IR spectra were taken on a Bruker Alfa FT-IR spectrometer (with KBr pellet) in 4000–400  $\text{cm}^{-1}$ . Powder X-ray diffraction (PXRD) patterns were taken on a Rigaku model Ultima IV diffractometer with Rigaku D/teX ultrahigh-speed position sensitive detector and Cu-K $\alpha$  X-ray (40 kV and 100 mA), in a step-scan mode with the scan rate of 2  $^{\circ}$ /min and step size of 0.02 $^{\circ}$ . Simulation of PXRD patterns was carried out using single-crystal diffraction data with the diffraction-crystal module of *Mercury*. Scanning electronic microscopy (SEM) and Energy-dispersive spectroscopy (EDS) were performed on a FEI Nova Nano 230 scanning electron microscope, with the energy of the electron beam being 15 and 20 keV, respectively. Inductively coupled plasma mass spectroscopy (ICP-MS) analysis was conducted by using a Perkin-Elmer ELAN 9000 instrument after degradation of the sample in  $\text{HNO}_3$ .

**Single-crystal X-ray diffraction.** Single crystal X-ray diffraction data were collected on an Agilent SuperNova Dual diffractometer with an AtlasS2 detector and Cu K $\alpha$  radiation ( $\lambda = 1.54184 \text{ \AA}$ ) at 100 K for TJNU-216, and 293 K for TJNU-216(Re). Multi-scan absorption corrections were performed using the *SADABS* program. The structures were solved by direct methods, and all non-hydrogen atoms were refined anisotropically by full-matrix least-squares method with the *SHELXTL* crystallographic software package. The final refinement was taken by full-matrix least-squares methods with anisotropic thermal parameters for all non-H atoms on  $F^2$ . Generally, C-bound H atoms were geometrically located and refined as riding. Isotropic displacement parameters of H atoms were derived from their parent atoms.  $\text{CF}_3\text{SO}_3^-$  anion in TJNU-216 was treated as the disordered model with 0.52/0.48 occupancies to achieve the appropriate thermal parameters. Further crystallographic data and structural refinement details are shown in Table S1.

## Synthesis of TJNU-216

A CH<sub>3</sub>CN solution (3 mL) of tib (17.1 mg, 0.05 mmol) was carefully layered onto a water solution (3 mL) of AgCF<sub>3</sub>SO<sub>3</sub> (19.3 mg, 0.075 mmol) with ethyl acetate as the intermediate layer in a straight glass tube. Colorless block crystals were obtained by slow evaporation of the solvent at room temperature after three days. Yield: 17.3 mg. The crystals were dipped in methanol solution for three days prior to use. Anal. Calcd for C<sub>20</sub>H<sub>15.5</sub>AgF<sub>3</sub>N<sub>8.5</sub>O<sub>3</sub>S: C, 38.76; H, 2.52; N, 19.21%. Found: C, 38.20; H, 2.29; N, 18.65%. IR (cm<sup>-1</sup>): 1537s, 1498s, 1260vs, 1170s, 1110w, 1064s, 1029m, 983w, 945w, 914w, 826m, 741m, 636s, 577w, 518w.

### **Synthesis of TJNU-216(Re)**

By simply soaking the TJNU-216 crystals (15 mg) into a KReO<sub>4</sub> water solution (5 mL, 0.05 mmol) for two days. Good quality crystals were generated and then washed by DMF several times. Anal. Calcd for C<sub>21</sub>H<sub>21</sub>N<sub>9</sub>O<sub>5</sub>ReAg: C, 32.61; H, 2.74; N, 16.30%. Found: C, 32.47; H, 2.76; N, 16.22%. IR (cm<sup>-1</sup>): 1670s, 1540m, 1495s, 1386w, 1310w, 1244m, 1067s, 897vs, 826w, 732w, 654m.

### **Anion exchange**

As-synthesized TJNU-216 materials (30 mg, 0.05 mmol) were added into the water solution (20 mL) of KReO<sub>4</sub> (58 mg, 0.2 mmol) and the mixture was stirred at room temperature. The solids were monitored at various time intervals to follow the exchange progress.

### **Adsorption kinetics**

As-synthesized TJNU-216 materials (15 mg, 0.025 mmol) were immersed into the aqueous solution (10 mL) of KReO<sub>4</sub> (72 ppm, 0.25 mM), and stirred at room temperature. Then the solution was separated at different time intervals by a syringe filter (PTFE, 0.25 mm). The anion concentration of ReO<sub>4</sub><sup>-</sup> remaining in the water phase and the trapping percentage of ReO<sub>4</sub><sup>-</sup> were determined by the ICP-MS measurements.

### **Adsorption isotherm**

As-synthesized TJNU-216 materials (5 mg) were immersed into the water solutions (10 mL)

of  $\text{KReO}_4$  (1000 ppm, 800 ppm, 500 ppm, 100 ppm, 10 ppm, 1 ppm or 50 ppb, respectively). The mixture was stirred at room temperature for 24 h to make sure that the equilibrium was achieved. The solution was separated from the crystals by a syringe filter (PTFE, 0.25 mm). The anion concentration of  $\text{ReO}_4^-$  remaining in the water phase and the trapping percentage of  $\text{ReO}_4^-$  were determined by the ICP-MS measurements. In order to explore the exchange thermodynamics of  $\text{ReO}_4^-$  by TJNU-216, Langmuir and Freundlich sorption models were applied.

In the Langmuir model, the adsorption of anions was assumed on a homogenous surface of MOF material, following a monolayer adsorption process. No interaction occurs between the anion and the adsorbent, suggesting homogenous binding site and equivalent adsorption energy. The equation of the Langmuir model is

$$\frac{c_e}{q_e} = \frac{1}{q_m k_L} + \frac{c_e}{q_m} \quad (1)$$

in which  $c_e$  is the equilibrium concentration of anion ( $\text{mg L}^{-1}$ ),  $q_e$  and  $q_m$  are the equilibrium and maximum adsorption amount ( $\text{mg g}^{-1}$ ), and  $k_L$  is a constant indirectly related to sorption amount and energy of sorption ( $\text{L mg}^{-1}$ ), characterizing the affinity of the adsorbate with the adsorbent. The fitting line was carried out by plotting  $c_e/q_e$  against  $c_e$ , and  $q_m$  and  $k_L$  can be calculated from the slope and intercept.

In the Freundlich adsorption model, it is based on a heterogeneous surface, suggesting different binding energies between the anion and surface sites of MOF. The equation of the Freundlich model is

$$\ln q_e = \ln k_F + \frac{1}{n} \ln c_e \quad (2)$$

where  $c_e$  and  $q_e$  are the equilibrium concentration of anion ( $\text{mg L}^{-1}$ ) and equilibrium adsorption amount ( $\text{mg g}^{-1}$ ), and  $k_F$  and  $n$  are the Freundlich constants which are related to sorption amount ( $\text{mg g}^{-1}$ ) and intensity of adsorption, characterizing the affinity of the adsorbate with the adsorbent.

### Hydrolytic stability

As-synthesized TJNU-216 materials (25 mg) were immersed in HNO<sub>3</sub> or NaOH solution of different pH values and stirred at room temperature for 24 h. Then, the solid was collected by filtration and washed with water several times. After that, the solids were used to remove ReO<sub>4</sub><sup>-</sup> from the aqueous solutions.

### **Exchange reversibility**

As-synthesized TJNU-216 materials (30 mg, 0.05 mmol) were added into the water solution (20 mL) of KReO<sub>4</sub> (58 mg, 0.2 mmol), which was stirred at room temperature for one day. The solids were monitored at various time intervals to follow the exchange progress by ICP-MS. Then, the ReO<sub>4</sub><sup>-</sup>-loaded TJNU-216 was washed with NaCF<sub>3</sub>SO<sub>3</sub> solution several times. The solution was separated from solid by a syringe filter (PTFE, 0.25 mm) and the concentration of desorbed ReO<sub>4</sub><sup>-</sup> anion in the aqueous phase was determined by the ICP-MS measurement.

### **Anion selectivity**

The effect of SO<sub>4</sub><sup>2-</sup> was tested by adding TJNU-216 (8 mg) into a water solution (10 mL) containing KReO<sub>4</sub> (0.025 mM) and Na<sub>2</sub>SO<sub>4</sub> (25 mM, 75 mM, 125 mM, 150 mM, 175 mM, 200 mM, 225 mM, 250 mM, 300 mM, 400 mM or 500 mM). Then, the aqueous solutions after sorption were diluted to proper concentration and the concentrations of ReO<sub>4</sub><sup>-</sup> in the dilute solutions were determined by ICP-MS. The competing effect of other anions including NO<sub>3</sub><sup>-</sup>, PO<sub>4</sub><sup>3-</sup>, CH<sub>3</sub>COO<sup>-</sup>, NO<sub>2</sub><sup>-</sup>, and Cl<sup>-</sup> were performed by adding TJNU-216 (8 mg) into a water solution (10 ml) containing KReO<sub>4</sub> (0.025 mM) containing NaNO<sub>3</sub> (7.5 mM), Na<sub>3</sub>PO<sub>4</sub> (1.25 mM), NaNO<sub>2</sub> (1.25 mM), CH<sub>3</sub>COONa (0.5 mM), CH<sub>3</sub>SO<sub>3</sub>Na (0.5 mM), and NaCl (0.25 mM), respectively. Then, the aqueous solutions after sorption were diluted to proper concentration and the concentrations of ReO<sub>4</sub><sup>-</sup> in dilute solutions were determined by ICP-MS.

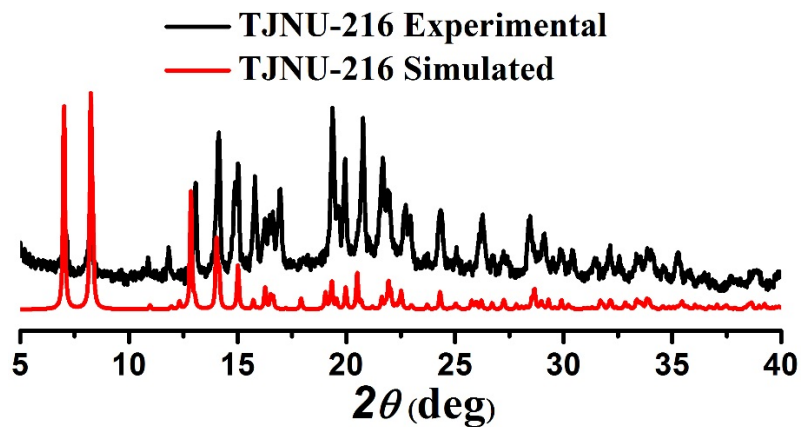

(a)

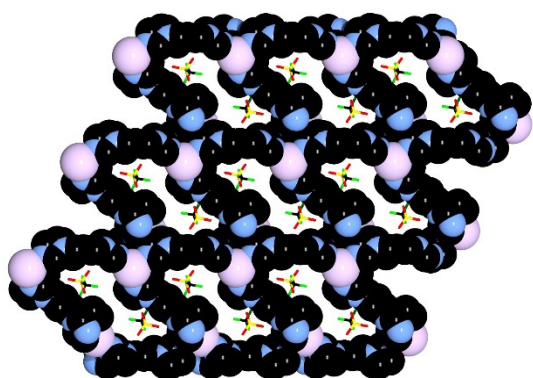

(b)

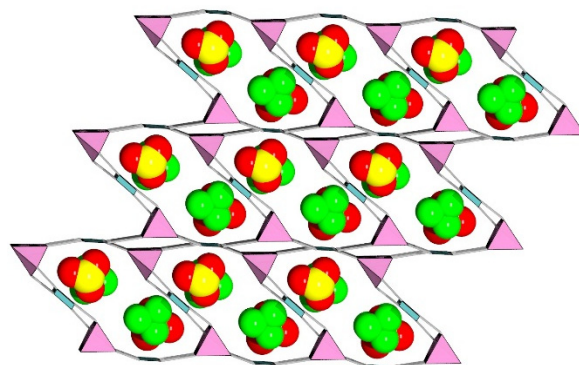

(c)

**Fig. S1** (a) PXR D patterns of TJNU-216. (b) View of the 3D structure of TJNU-216 along the  $a$  axis, with the cationic framework showing as space-filling mode. (c) Topological view of the 3D network of TJNU-216. The Ag(I) and tib nodes were simplified as pink tetrahedron and cyan square, respectively.

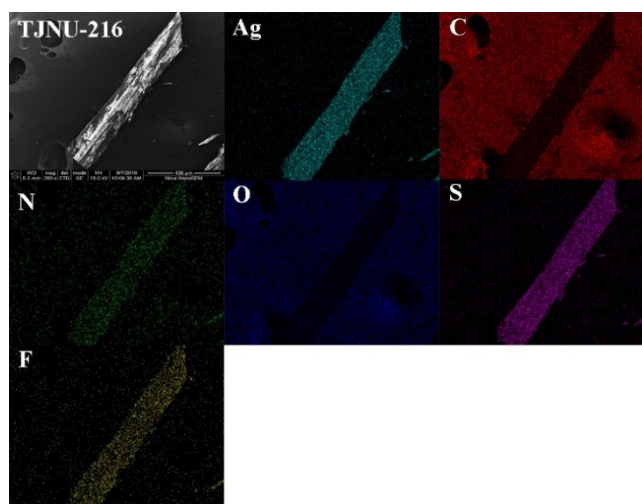

(a)

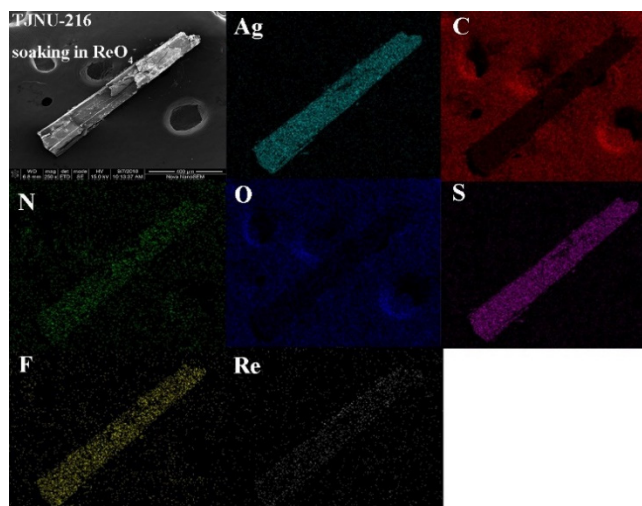

(b)

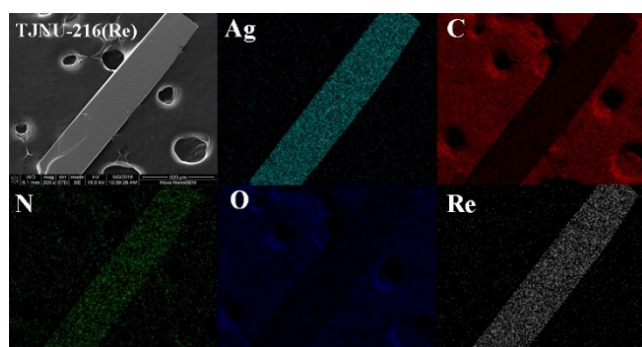

(c)

**Fig. S2** SEM images and EDS mapping of TJNU-216 during the anion-exchange process:  
0 min (a), 1 min (b), and 10 min (c).

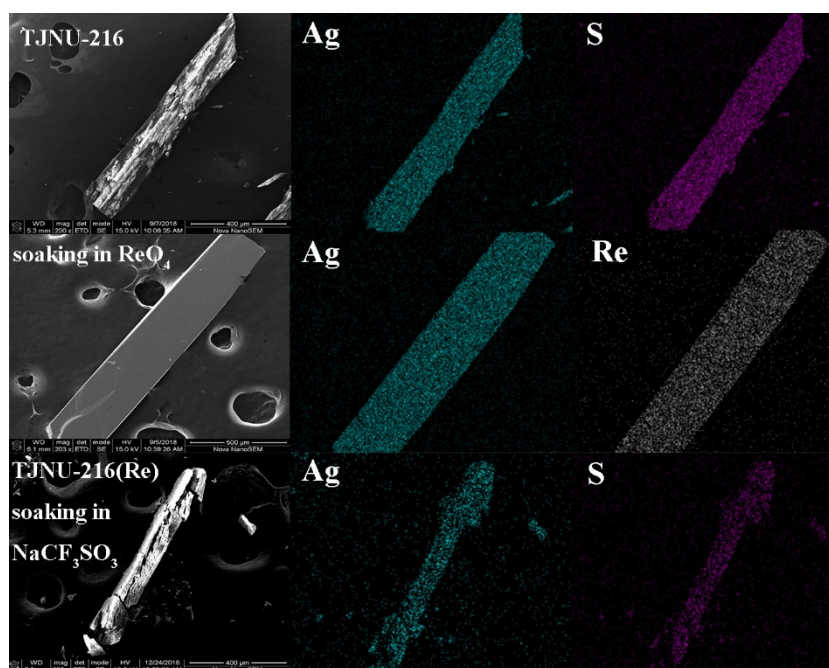

(a)

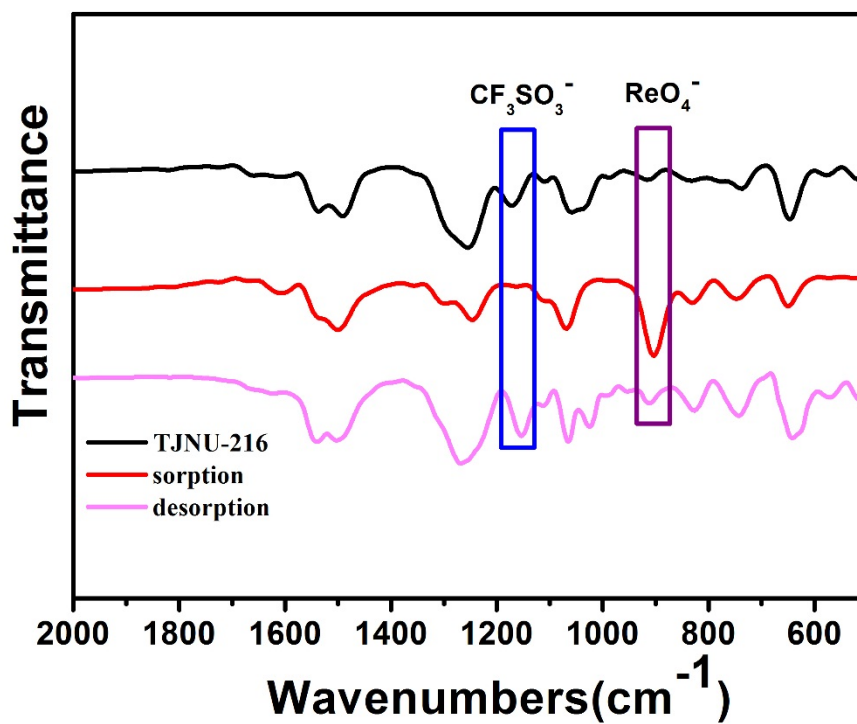

(b)

**Fig. S3** SEM-EDS mapping (a) and FT-IR spectra (b) of the TJNU-materials after six cycles.



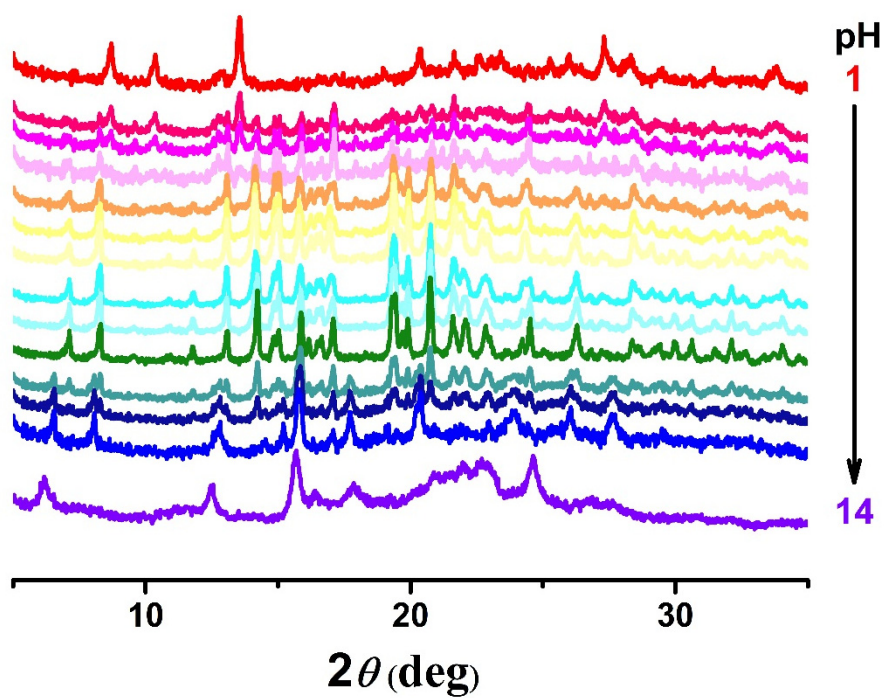

Fig. S4 PXRD patterns of TJNU-216 after immersing in aqueous solutions of pH = 1–14.

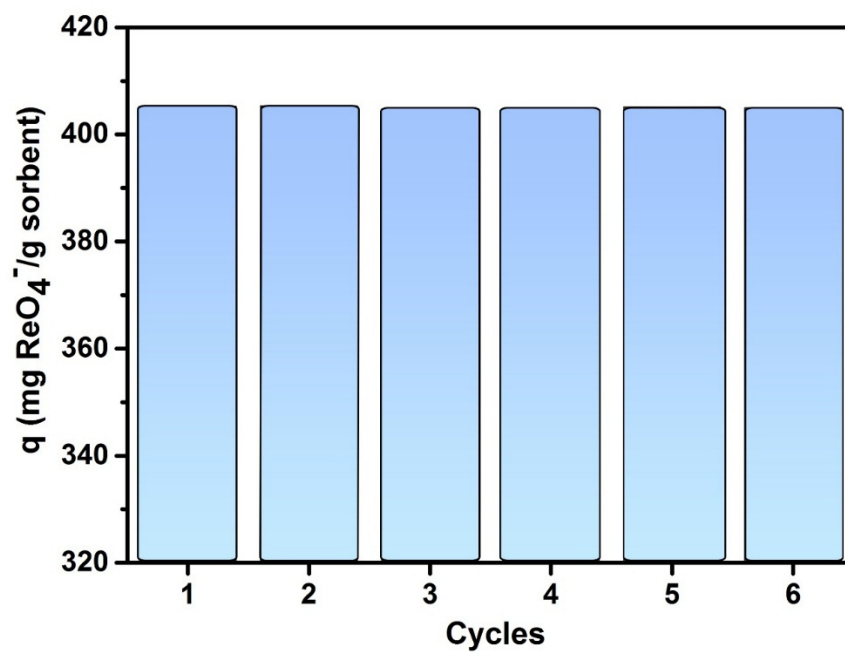

Fig. S5 The uptake capacity of TJNU-216 materials after each cycle.

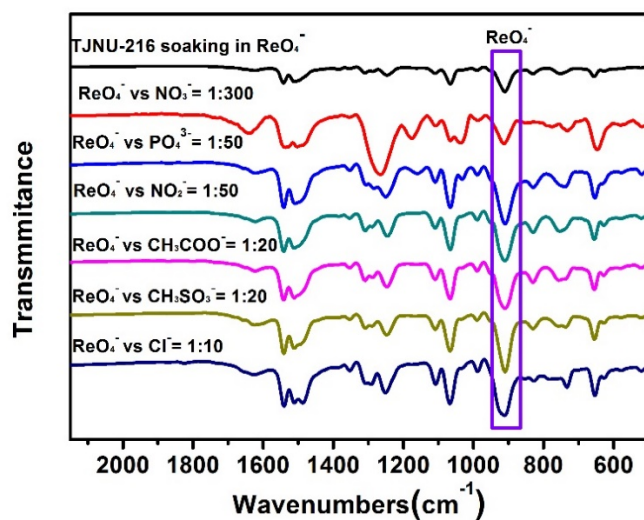

(a)

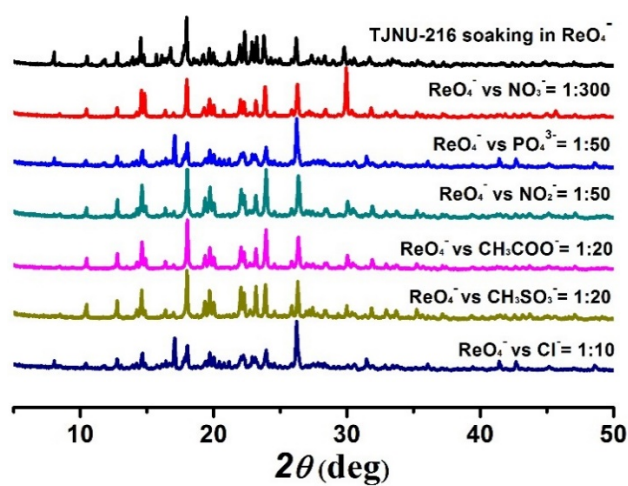

(b)

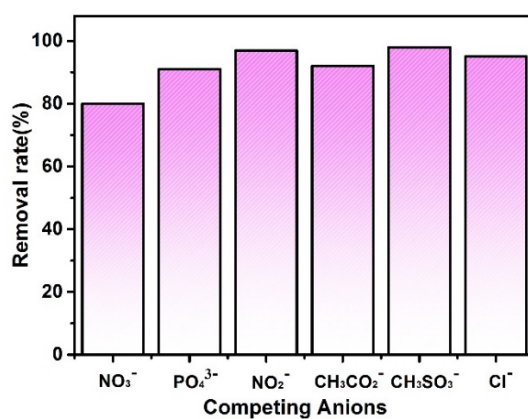

(c)

**Fig. S6** FT-IR (a) and PXRD patterns (b) of  $\text{ReO}_4^-$  loaded TJNU-216. (c) Removal rate of TJNU-216 materials in the presence of  $\text{ReO}_4^-$  and competing anions with various ratios.

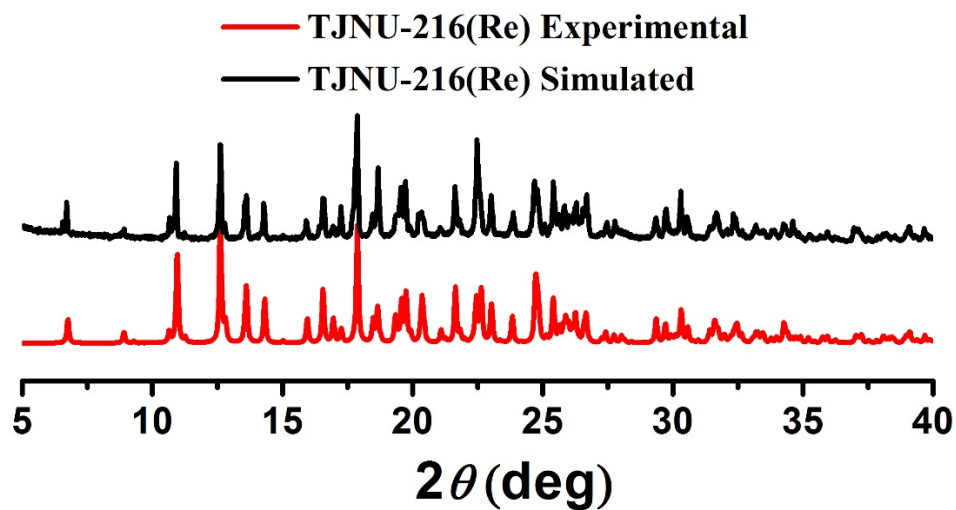

(a)

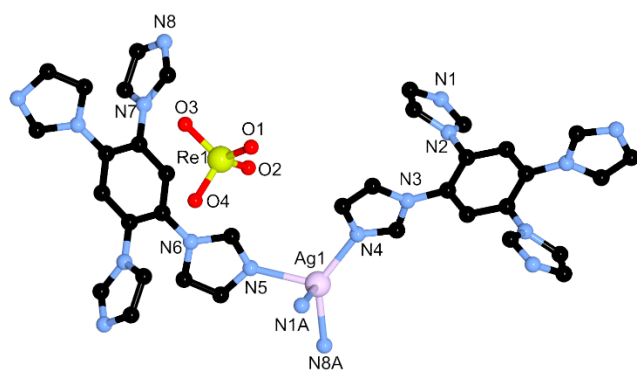

(b)

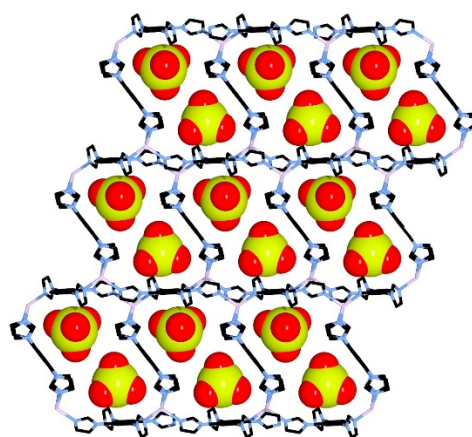

(c)

**Fig. S7** (a) PXRD patterns of TJNU-216(Re). View of the asymmetric unit (b) and 3D structure (c) of TJNU-216(Re) along the *a* axis, with the  $\text{ReO}_4^-$  anions showing as space-filling mode.

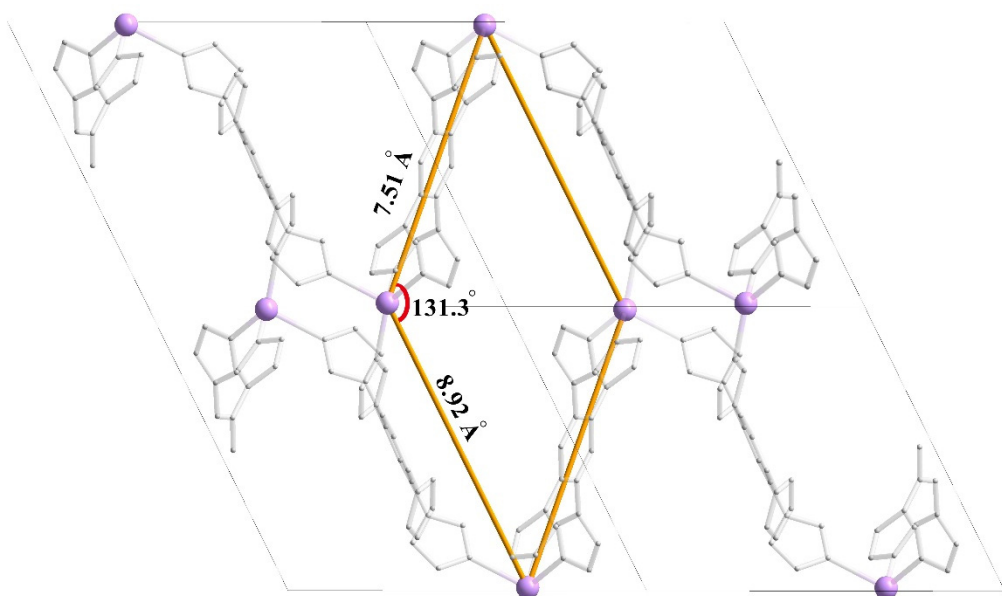

(a)

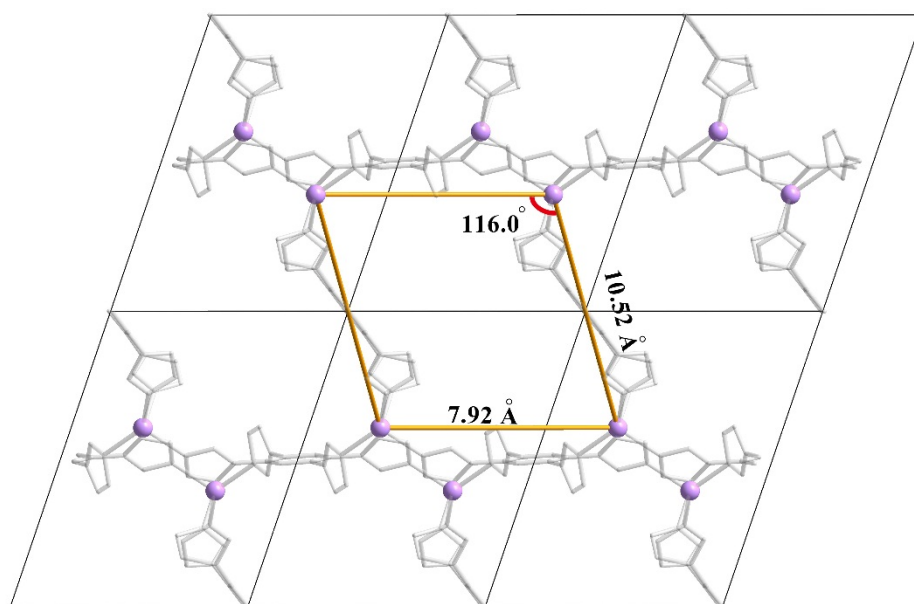

(b)

**Fig. S8** The dimensions of the 1D channels in TJNU-216 (a) and TJNU-216(Re) (b).

**Table S1** Crystallographic data and refinement details for TJNU-216 and TJNU-216(Re).

|                                                                               | TJNU-216                                                                             | TJNU-216(Re)                                                       |
|-------------------------------------------------------------------------------|--------------------------------------------------------------------------------------|--------------------------------------------------------------------|
| Formula                                                                       | C <sub>20</sub> H <sub>15.5</sub> AgF <sub>3</sub> N <sub>8.5</sub> O <sub>3</sub> S | C <sub>21</sub> H <sub>21</sub> AgN <sub>9</sub> O <sub>5</sub> Re |
| Formula mass                                                                  | 619.84                                                                               | 773.54                                                             |
| Crystal system                                                                | Triclinic                                                                            | Triclinic                                                          |
| <i>a</i> /Å                                                                   | 8.7133(5)                                                                            | 9.0819(3)                                                          |
| <i>b</i> /Å                                                                   | 12.3600(7)                                                                           | 11.3685(4)                                                         |
| <i>c</i> /Å                                                                   | 13.3642(8)                                                                           | 13.9457(6)                                                         |
| <i>α</i> /°                                                                   | 113.788(6)                                                                           | 103.728(4)                                                         |
| <i>β</i> /°                                                                   | 93.665(5)                                                                            | 98.178(4)                                                          |
| <i>γ</i> /°                                                                   | 107.309(5)                                                                           | 112.943(4)                                                         |
| Unit cell volume/Å <sup>3</sup>                                               | 1229.18(14)                                                                          | 1242.94(9)                                                         |
| Temperature/K                                                                 | 100.00(10)                                                                           | 293(2)                                                             |
| Space group                                                                   | <i>P</i> -1                                                                          | <i>P</i> -1                                                        |
| <i>Z</i>                                                                      | 2                                                                                    | 2                                                                  |
| Absorption coefficient, μ/mm <sup>-1</sup>                                    | 0.968                                                                                | 16.152                                                             |
| No. of reflections measured                                                   | 8892                                                                                 | 8212                                                               |
| No. of independent reflections                                                | 4327                                                                                 | 4857                                                               |
| <i>R</i> <sub>int</sub>                                                       | 0.0427                                                                               | 0.0329                                                             |
| Final <i>R</i> <sub>1</sub> values ( <i>I</i> > 2σ( <i>I</i> ))               | 0.0787                                                                               | 0.0515                                                             |
| Final <i>wR</i> ( <i>F</i> <sup>2</sup> ) values ( <i>I</i> > 2σ( <i>I</i> )) | 0.2001                                                                               | 0.1372                                                             |
| Final <i>R</i> <sub>1</sub> values (all data)                                 | 0.0955                                                                               | 0.0554                                                             |
| Final <i>wR</i> ( <i>F</i> <sup>2</sup> ) values (all data)                   | 0.2117                                                                               | 0.1419                                                             |
| Goodness of fit on <i>F</i> <sup>2</sup>                                      | 1.066                                                                                | 1.008                                                              |

**Table S2** Summary on  $\text{ReO}_4^-$  adsorption efficiency by various anion-exchange materials.

| Materials                          | Adsorption capacity<br>( $\text{mg g}^{-1}$ ) | Removal percent-<br>age (%) | $K_d$ ( $\text{mL g}^{-1}$ ) | Ref       |
|------------------------------------|-----------------------------------------------|-----------------------------|------------------------------|-----------|
| PAF-1-F                            | 420                                           | 97                          | $2.55 \times 10^4$           | 1         |
| MIL-101(Cr)                        | 215                                           | 72                          | $8.9 \times 10^3$            | 1         |
| MIL-101-F                          | 237                                           | 87                          | $2.1 \times 10^5$            | 1         |
| SCU-100                            | 541                                           | >99                         | $3.3 \times 10^5$            | 2         |
| SCU-101                            | 217                                           | >95                         | $7.5 \times 10^5$            | 3         |
| UIO-66- $\text{NH}_3^+$            | 159                                           | 66                          | 837                          | 4         |
| SLUG-21                            | 602                                           | 95                          | $3.8 \times 10^5$            | 5         |
| Mg-Al-LDH                          | 10                                            | 21                          | 262                          | 2         |
| NDTB-1                             | 19                                            | 39                          | 652                          | 2         |
| $\text{Y}_2(\text{OH})_5\text{Cl}$ | 25                                            | 10                          | 112                          | 2         |
| SCU-6                              | 0.06                                          | 14                          | 54                           | 6         |
| SCU-7                              | 0.4                                           | 90                          | $3 \times 10^3$              | 6         |
| SBN                                | 786                                           | >99                         | $8.3 \times 10^5$            | 7         |
| SCU-CPN-1                          | 999                                           | >99                         | $6.2 \times 10^5$            | 8         |
| TJNU-216                           | 417                                           | >99                         | $8.2 \times 10^5$            | this work |

**Table S3** Hydrogen-bonding geometries (Å, °) in the structure of TJNU-216(Re).

| D–H...A                   | $d_{D...A}$ | $d_{H...A}$ | $\angle_{D-H...A}$ | Symmetry codes   |
|---------------------------|-------------|-------------|--------------------|------------------|
| C8–H8...O2                | 3.453(13)   | 2.56        | 162                |                  |
| C12–H12...O2              | 3.191(12)   | 2.40        | 142                |                  |
| C16–H16...O4 <sup>a</sup> | 3.243(18)   | 2.42        | 148                | 1 – x, –y, 1 – z |

## Reference

1. D. Banerjee, S. K. Elsaidi, B. Aguila, B. Y. Li, D. Kim, M. J. Schweiger, A. A. Kruger, C. J. Doonan, S. Q. Ma and P. K. Thallapally, *Chem. Eur. J.*, 2016, **22**, 17581.
2. D. Sheng, L. Zhu, C. Xu, C. Xiao, Y. Wang, Y. Wang, L. Chen, J. Diwu, J. Chen, Z. Chai, T. E. Albrecht-Schmitt and S. Wang, *Environ. Sci. Technol.*, 2017, **51**, 3471.
3. L. Zhu, D. Sheng, C. Xu, X. Dai, M. A. Silver, J. Li, P. Li, Y. Wang, Y. Wang, L. Chen, C. Xiao, J. Chen, R. Zhou, C. Zhang, O. K. Farha, Z. Chai, T. E. Albrecht-Schmitt and S. Wang, *J. Am. Chem. Soc.*, 2017, **139**, 14873.
4. D. Banerjee, W. Q. Xu, Z. M. Nie, L. E. V. Johnson, C. Coghlan, M. L. Sushko, D. Kim, M. J. Schweiger, A. A. Kruger, C. J. Doonan and P. K. Thallapally, *Inorg. Chem.*, 2016, **55**, 8241.
5. H. H. Fei, M. R. Bresler and S. R. J. Oliver, *J. Am. Chem. Soc.*, 2011, **133**, 11110.
6. Z. Bai, Y. Wang, Y. Li, W. Liu, L. Chen, D. Sheng, D. Juan, Z. Chai, T. E. Albrecht-Schmitt and S. Wang, *Inorg. Chem.*, 2016, **55**, 6358.
7. L. Zhu, C. Xiao, X. Dai, J. Li, D. Gui, D. Sheng, L. Chen, R. Zhou, Z. Chai, T. E. Albrecht-Schmitt and S. Wang, *Environ. Sci. Technol. Lett.*, 2017, **4**, 316.
8. J. Li, X. Dai, L. Zhu, C. Xu, D. Zhang, M. A. Silver, P. Li, L. Chen, Y. Li, D. Zuo, H. Zhang, C. Xiao, J. Chen, J. Diwu, O. K. Farha, T. E. Albrecht-Schmitt, Z. Chai and S. Wang, *Nat. Commun.*, 2018, **9**, 3007.
